# Supplementary material
Source: MDPI journal article supplement (https://www.mdpi.com/1424-2818/5/3/613)
Supplement: s1 [file s1]

## Supplementary Material

**Table S1.** Type 1, Type 2, Type 3, and Type 4 Diversity for mangroves along a ria coast in the Kimberley region, with a focus on *Avicennia marina* for Type 3 and Type 4 Diversity (information simplified from [42–44]).

|                                                                                                                                                                                                                                        |                                                                                                                                                                                                                                                                                                                                                                                                                                                                                                                                                                                                                                                                                                                                                                                                                                                                                                                                                                                                                                                                                                                                                                                                                                                                                                                                                                                                                                                                                                                                                                                                                                                                                       |
|----------------------------------------------------------------------------------------------------------------------------------------------------------------------------------------------------------------------------------------|---------------------------------------------------------------------------------------------------------------------------------------------------------------------------------------------------------------------------------------------------------------------------------------------------------------------------------------------------------------------------------------------------------------------------------------------------------------------------------------------------------------------------------------------------------------------------------------------------------------------------------------------------------------------------------------------------------------------------------------------------------------------------------------------------------------------------------------------------------------------------------------------------------------------------------------------------------------------------------------------------------------------------------------------------------------------------------------------------------------------------------------------------------------------------------------------------------------------------------------------------------------------------------------------------------------------------------------------------------------------------------------------------------------------------------------------------------------------------------------------------------------------------------------------------------------------------------------------------------------------------------------------------------------------------------------|
| Type 1<br>Diversity—15 species of mangroves (see Figure 4C)                                                                                                                                                                            | 1. <i>Scyphiphora hydrophylacea</i> , 2. <i>Xylocarpus granatum</i> , 3. <i>Bruguiera parviflora</i> , 4. <i>Camptostemon schultzei</i> , 5. <i>Lumnitzera racemosa</i> , 6. <i>Xylocarpus moluccensis</i> , 7. <i>Sonneratia alba</i> , 8. <i>Excoecaria agallocha</i> , 9. <i>Osbornia octodonta</i> , 10. <i>Aegiceras corniculatum</i> , 11. <i>Bruguiera exaristata</i> , 12. <i>Ceriops tagal</i> , 13. <i>Aegialitis annulata</i> , 14. <i>Rhizophora stylosa</i> , 15. <i>Avicennia marina</i>                                                                                                                                                                                                                                                                                                                                                                                                                                                                                                                                                                                                                                                                                                                                                                                                                                                                                                                                                                                                                                                                                                                                                                                |
| Type 2<br>Diversity—mangrove floristic assemblages selected by the six macro-habitats (tidal flat, tidal creek, spit/chenier, rocky shore, hinterland margin, high-tidal alluvial fan)                                                 | tidal flat: mainly 10 mangrove species in this habitat, zoned across the tidal flat— <i>Aegiceras corniculatum</i> , <i>Aegialitis annulata</i> , <i>Avicennia marina</i> , <i>Bruguiera exaristata</i> , <i>Bruguiera parviflora</i> , <i>Ceriops tagal</i> , <i>Excoecaria agallocha</i> , <i>Lumnitzera racemosa</i> , <i>Rhizophora stylosa</i> , <i>Sonneratia alba</i><br>tidal creek: mainly 5 mangrove species in this habitat, zoned from the creek bank— <i>Aegiceras corniculatum</i> , <i>Aegialitis annulata</i> , <i>Avicennia marina</i> , <i>Camptostemon schultzei</i> , <i>Rhizophora stylosa</i><br>spit/chenier: mainly 7 mangrove species in this habitat, zoned across the spit shore— <i>Aegialitis annulata</i> , <i>Avicennia marina</i> , <i>Bruguiera exaristata</i> , <i>Ceriops tagal</i> , <i>Excoecaria agallocha</i> , <i>Osbornia octodonta</i> , <i>Rhizophora stylosa</i><br>rocky shore: mainly 5 mangrove species in this habitat, zoned across the tidal interval— <i>Aegialitis annulata</i> , <i>Avicennia marina</i> , <i>Bruguiera exaristata</i> , <i>Ceriops tagal</i> , <i>Rhizophora stylosa</i><br>hinterland margin: mainly 6 mangrove species in this habitat— <i>Aegialitis annulata</i> , <i>Avicennia marina</i> , <i>Bruguiera exaristata</i> , <i>Ceriops tagal</i> , <i>Excoecaria agallocha</i> , <i>Lumnitzera racemosa</i><br>high-tidal alluvial fan: mainly 7 mangrove species in this habitat, zoned across the fan— <i>Aegialitis annulata</i> , <i>Avicennia marina</i> , <i>Bruguiera exaristata</i> , <i>Ceriops tagal</i> , <i>Lumnitzera racemosa</i> , <i>Xylocarpus granatum</i> , <i>Xylocarpus moluccensis</i> |
| Type 3<br>Diversity (using <i>Avicennia marina</i> within tidal flat habitat and spit/chenier habitat as examples)— <i>Avicennia marina</i> physiognomy and structure variable across the habitat determined by intra-habitat features | seaward mangroves on tidal flat at Mean Sea Level (MSL): closed low forest of columnar trees or recumbent gnarled trees<br>middle of mangroves on tidal flat at Mean High Water Neap (MHWN): closed scrub or low forest of single-trunked to multi-stemmed plants<br>landward mangroves on tidal flat at Mean High Water Spring (MWHS): closed scrub or heath of multi-stemmed plants<br>seaward mangroves on spit at MSL: closed scrub or low forest of single-trunked to multi-stemmed plants<br>middle of mangroves on spit at MHWN: closed scrub or low forest of single-trunked to multi-stemmed plants<br>landward mangroves on spit at MWHS: closed scrub or heath of multi-stemmed plants                                                                                                                                                                                                                                                                                                                                                                                                                                                                                                                                                                                                                                                                                                                                                                                                                                                                                                                                                                                     |

Table S1. Cont.

|                                |                                                                    |
|--------------------------------|--------------------------------------------------------------------|
| Type 4                         | seaward mangroves on tidal flat at MSL: large elliptical leaves,   |
| Diversity (using               | dominantly asexual reproduction, biomass dominantly above ground   |
| <i>Avicennia marina</i> within | landward mangroves on tidal flat at MWHS: small oval to elliptical |
| tidal flat habitat and         | leaves, dominantly asexual reproduction, biomass dominantly        |
| spit/chenier habitat as        | below ground                                                       |
| examples)— <i>Avicennia</i>    | seaward mangroves on spit at MSL: large elliptical leaves,         |
| <i>marina</i> physiognomy,     | asexual reproduction and sexual reproduction, biomass dominantly   |
| foliage, and reproductive      | above ground                                                       |
| strategy variable across       | landward mangroves on spit at MWHS: small oval to elliptical       |
| the habitat determined by      | leaves, asexual reproduction and sexual reproduction,              |
| intra-habitat features         | biomass dominantly above ground                                    |

**Table S2.** Type 1, Type 2, Type 3, and Type 4 Diversity for mangroves along a ria coast in the Pilbara region, with a focus on *Avicennia marina* for Type 3 and Type 4 Diversity (information simplified from [26,43,44]).

|                           |                                                                                                                                                                                                                                                         |
|---------------------------|---------------------------------------------------------------------------------------------------------------------------------------------------------------------------------------------------------------------------------------------------------|
| Type 1                    | 9. <i>Osbornia octodonta</i> , 10. <i>Aegiceras corniculatum</i> , 11. <i>Bruguiera</i>                                                                                                                                                                 |
| Diversity—7 species of    | <i>exaristata</i> , 12. <i>Ceriops tagal</i> , 13. <i>Aegialitis annulata</i> , 14. <i>Rhizophora</i>                                                                                                                                                   |
| mangroves (see Figure 4C) | <i>stylosa</i> , 15. <i>Avicennia marina</i>                                                                                                                                                                                                            |
|                           | tidal flat: mainly 5 mangrove species in this habitat, zoned across the tidal flat— <i>Aegialitis annulata</i> , <i>Avicennia marina</i> , <i>Bruguiera exaristata</i> , <i>Ceriops tagal</i> , <i>Rhizophora stylosa</i>                               |
| Type 2                    | tidal creek: mainly 4 mangrove species in this habitat, zoned from the creek bank— <i>Aegiceras corniculatum</i> , <i>Aegialitis annulata</i> , <i>Avicennia marina</i> , <i>Rhizophora stylosa</i>                                                     |
| Diversity—mangrove        | spit/chenier: mainly 6 mangrove species in this habitat, zoned across the spit shore— <i>Aegialitis annulata</i> , <i>Avicennia marina</i> , <i>Bruguiera exaristata</i> , <i>Ceriops tagal</i> , <i>Osbornia octodonta</i> , <i>Rhizophora stylosa</i> |
| floristic assemblages     | rocky shore: mainly 3 mangrove species in this habitat, zoned across the tidal interval— <i>Aegialitis annulata</i> , <i>Avicennia marina</i> , <i>Rhizophora stylosa</i>                                                                               |
| selected by the six       | hinterland margin: mainly 2 mangrove species in this habitat— <i>Avicennia marina</i> , <i>Ceriops tagal</i>                                                                                                                                            |
| macro-habitats (tidal     | high-tidal alluvial fan: mainly 3 mangrove species in this habitat, zoned across the fan— <i>Aegialitis annulata</i> , <i>Avicennia marina</i> , <i>Ceriops tagal</i>                                                                                   |
| flat, tidal creek,        | seaward mangroves on tidal flat at MSL: closed low forest of columnar trees or recumbent gnarled trees                                                                                                                                                  |
| spit/chenier, rocky       | middle of mangroves on tidal flat at MHWN: closed scrub or low forest of single-trunked to multi-stemmed plants                                                                                                                                         |
| shore, hinterland         |                                                                                                                                                                                                                                                         |
| margin, high-tidal        |                                                                                                                                                                                                                                                         |
| alluvial fan)             |                                                                                                                                                                                                                                                         |

Table S2. Cont.

|                                         |                                                                            |
|-----------------------------------------|----------------------------------------------------------------------------|
| Type 3                                  | landward mangroves on tidal flat at MWHS: closed scrub or heath of         |
| Diversity (using <i>Avicennia</i>       | multi-stemmed plants                                                       |
| <i>marina</i> within tidal flat habitat | seaward mangroves on spit at MSL: closed scrub or low forest of            |
| and spit/chenier habitat as             | single-trunked to multi-stemmed plants                                     |
| examples)— <i>Avicennia marina</i>      | middle of mangroves on spit at MHWN: closed scrub or low forest of         |
| physiognomy and structure               | single-trunked to multi-stemmed plants                                     |
| variable across the habitat             | landward mangroves on spit at MWHS: closed scrub or heath of               |
| determined by intra-habitat             | multi-stemmed plants                                                       |
| features                                |                                                                            |
| Type 4                                  | seaward mangroves on tidal flat at MSL: large elliptical leaves,           |
| Diversity (using <i>Avicennia</i>       | dominantly asexual reproduction, biomass dominantly above ground           |
| <i>marina</i> within tidal flat habitat | landward mangroves on tidal flat at MWHS: small oval to elliptical leaves, |
| and spit/chenier habitat as             | dominantly asexual reproduction, biomass dominantly below ground           |
| examples)— <i>Avicennia marina</i>      | seaward mangroves on spit at MSL: large elliptical leaves, asexual         |
| physiognomy, foliage, and               | reproduction and sexual reproduction, biomass dominantly above ground      |
| reproductive strategy variable          | landward mangroves on spit at MWHS: small oval to elliptical               |
| across the habitat determined           | leaves, asexual reproduction and sexual reproduction, biomass              |
| by intra-habitat features               | dominantly above ground                                                    |
